# Supplementary material for: Genome sequencing in microfabricated high-density picolitre reactors
Source: Springer Nature journal article supplement (doi:10.1038/nature03959), 2005-07-31
Supplement: nature03959-s3.doc [file nature03959-s3.doc]

Materials and Methods

Library Preparation (Supplementary Figure 1)

*DNA Fragmentation.*Genomic DNA samples were obtained from different sources, ranging from bacterial colonies to lyophilized samples received from commercial vendors. Upon receipt, using an OD260/280 ratio of 1.8 to 2.0, the concentration (>300 μg/mL) was verified. Fifteen micrograms of genomic DNA were diluted to a final volume of 100 µL in 1X TE buffer (10 mM Tris, 1 mM EDTA, pH 7.6) in a 2.0 mL tube. The sample was further diluted by the addition of 1.6 mL of ice-cold Nebulization Buffer (53.1% Glycerol, 37 mM Tris-HCl, 5.5 mM EDTA, pH 7.5) and gently mixed by repeated reciprocal pipette action.

The DNA solution was fragmented using an Aeromist Nebulizer (Alliance Medical, Russleville, MO), which had been modified as described below, inside a PCR hood (Labconco, Kansas City, MO, USA) that was vented outside the laboratory. Briefly, a cap from a 15 mL snap cap Falcon tube was placed over the top of the nebulizer. To reduce loss caused by sample spray during nebulization, a nebulizer condensing tube consisting of a 0.50” OD x 0.31” ID x 1.5” long section of silicone tubing was affixed over the existing nebulizer feed tube. The DNA sample mixture was transferred to the bottom of the nebulizer chamber, and the top of the nebulizer tightly threaded onto the chamber. A loose-fitting, custom-built, delrin cap was designed to cover the top of the nebulizer and provide a lateral groove on the outside of the nebulizer for securing a pair of size #34 buna-N O-rings that held the cap in place. The entire nebulizer assembly was then wrapped tightly in parafilm (American Nat’l Can, Menasha, WI). The nebulizer was then connected to a nitrogen tank with the supplied tube, and the tube connections wrapped in parafilm.

The assembled nebulizer was placed upright in an ice bucket, with the bottom half of the unit submerged in the ice. The nitrogen gas was applied for 5 minutes at 50 psi; condensation on the walls of the nebulizer was knocked to the bottom of the chamber with occasional tapping. The gas was turned off, and the pressure allowed to normalize for 30 seconds before the tubing was removed from the nebulizer. The nebulizer was carefully dissembled, and the sample transferred to a 1.5 mL microcentrifuge tube. The recovered volume typically exceeded 900 µL.

The nebulized DNA was purified by centrifugation through a Qiaquick PCR Purification column (Qiagen, Valencia, CA), according to the manufacturer’s instructions. Due to the large volume, the DNA sample was loaded and purified in several aliquots over the same column. The purified DNA was eluted with 30 µL of 55 ºC Buffer EB (supplied in the Qiagen kit). The size distribution of the nebulized fragments was determined by resolving a 2 µL aliquot of the nebulized material on an Agilent 2100 BioAnalyzer (Agilent, Palo Alto, CA.) using a DNA 1000 LabChip. (See Supplementary Figure 2 for a representative trace). The recovered material exhibited a size range of 50 to 900 bp with a mean fragment size of 325±50 bp.

*Enzymatic Polishing.*DNA nebulization generates fragments with a preponderance of frayed ends (*1, 2*). Fragments were blunt-ended and phosphorylated through the activity of three enzymes: T4 DNA polymerase, *E. coli* DNA polymerase (Klenow fragment) (New England Biolabs, Beverly, MA), and T4 polynucleotide kinase (New England Biolabs).

In a 0.2 mL tube, the remaining 28 µL of purified, nebulized DNA fragments were combined with 5 µL Molecular Biology Grade water (Eppendorf, Hamburg, Germany), 5 µL 10X NEBuffer 2 (New England Biolabs), 5 µL 1mg/mL BSA (New England Biolabs), 2 µL 10mM dNTPs (Pierce, Rockford, IL.), and 5 µL 3u/μL T4 DNA polymerase (New England Biolabs). The polishing reaction was thoroughly mixed and incubated in a thermocycler (MJ Research, Waltham, MA) for 10 minutes at 25 °C. Following incubation, 1.25 µL of 5u/μL *E. coli* DNA polymerase (Klenow fragment) (New England Biolabs) were added, the reaction mixed well and incubated for an additional 10 minutes at 25 °C followed by 2 hours at 16 °C.

The polishing reaction was then purified over a Qiaquick PCR Purification column, eluted with 30 µL of 55 ºC Buffer EB, and transferred to a 0.2 mL tube for phosphorylation. The DNA was diluted to 50 µL through the addition of 5 µL Molecular Biology Grade water, 5 µL 10X T4 PNK buffer (New England Biolabs), 5 µL 10mM ATP (Pierce), and 5 µL of 10u/µL T4 PNK (New England Biolabs). The reaction was mixed and incubated for 30 minutes at 37 °C, followed by a 20 minute incubation at 65 °C. The phosphorylated fragments were then purified over a Qiaquick PCR Purification column as before, and eluted in 30 µL of 55 ºC Buffer EB. The DNA concentration in a 2 µL aliquot was quantitated by fluorometry using a Turner TBS-380 Mini-Fluorometer (Turner Biosystems, Sunnyvale, CA).

Following fragmentation and polishing of the genomic DNA library, primer sequences were added to the each end of the DNA fragments. The 44-base primer sequences, (hereafter referred to as “adaptors”) were double-stranded oligonucleotides comprised of a 5’ 20 base PCR amplification primer followed by a 20 base sequencing primer, and a 3’, 4 base, nonpalindromic sequencing “key” comprised of one of each deoxyribonucleotide (e.g. AGTC). Two classes of adaptors, termed “adaptor A” and “adaptor B”, were used in each reaction. The A and B adaptors differed in both nucleotide sequence and the presence of a 5’ biotin tag on the B adaptor. The adaptor pairs were designed to allow directional ligation to the blunt-ended, fragmented genomic DNA (Adaptor A: CCATCTCATCCCTGCGTGTCCCATCTGTTCCCTCCCTGTCTCAG. Adaptor B: /5BioTEG/CCTATCCCCTGTGTGCCTTGCCTATCCCCTGTTGCGTGTCTCAG). For each adaptor pair, the PCR priming region contained a 5’ four-base overhang and a blunt-ended 3’ key region. Directionality was achieved as the 3’ blunt-end side of the adaptor ligated to the blunt-ended genomic DNA fragment while the 5’ overhang prevented ligation to the PCR primer region of the adaptor.

The remaining 28 µL of nebulized, polished DNA were transferred to a 0.2 mL tube and combined with 20.6 µL Molecular Biology Grade water, 60 µL 2X Quick Ligase Reaction Buffer (New England Biolabs), 1.8 µL of an equimolar mix of adaptor A and B (200 pmol of each adaptor/µL), 9.6 µL of 2000 U/µL Quick Ligase (New England Biolabs). The tube contents were thoroughly mixed, incubated for 20 minutes at 25 °C, purified twice over a Qiaquick PCR Purification column, and eluted in 30 µL of 55ºC Buffer EB after each centrifugation.

*Gel purification.*A 2% agarose (Invitrogen, Carlsbad, CA) /TBE slab gel was prepared with 4.5 µL of a 10mg/mL stock of Ethidium Bromide (Fisher Scientific, Pittsburgh, PA) added to the molten agarose solution. Three microliters of 10X Ready-Load Dye (Invitrogen) were added to 30 µL of ligated DNA library, and the dye/ligation reaction loaded into two adjacent wells in the gel (approximately 16.5 µL per lane). Ten microliters (1 μg) of a 100-bp ladder (Invitrogen) were loaded into flanking wells on either side of the library samples, with two empty lanes separating the library and ladder samples. The gel was run at 100V for 3 hours, after which the gel was transferred to a GelDoc (BioRad, Hercules, CA) UV box which had been draped with plastic wrap to reduce the chance of contamination. A sterile, single-use scalpel was used to excise the region of each library sample migrating between the 250 and 500 base pair markers in the DNA ladders, and the gel slices were then placed in a 15 mL Falcon tube. The library was extracted from the each agarose plug with 2 columns from a MinElute Gel Extraction Kit (Qiagen), one per sample. The process was conducted according to the manufacturer’s instructions, with the following modifications. Due to the large volume of dissolved agarose, each library was broken into several aliquots and serially processed through the respective column. Also, the duration of the dry spin after the Buffer PE spin was extended to 2 minutes (rather than 1 minute) to ensure complete removal of the ethanol, and the eluates from each column were pooled to achieve a final library volume of 20 µL. One microliter of the isolated library was analyzed on a BioAnalyzer DNA 1000 LabChip to verify that the size distribution of the library population fell between 250 and 500 bp.

*Nick Repair.* The two nicks at the 3’-junctions were repaired by the strand-displacement activity of *Bst* DNA polymerase, Large Fragment. The remaining 19 µL of the size fractionated library were combined with 40 µL of Molecular Biology Grade water, 8 µL 10X ThermoPol Reaction Buffer (New England Biolabs), 8 µL of 1mg/mL BSA (New England Biolabs), 2 µL 10 mM dNTPs (Pierce), and 3 µL of 8U/μL *Bst* DNA polymerase, Large Fragment (New England Biolabs), and incubated for 30 minutes at 65 °C for 30 minutes.

*Isolation of the single-stranded AB adapted library.*One hundred microliters of stock M-270 Streptavidin beads (Dynal, Oslo, Norway) were washed twice in a 1.5mL microcentrifuge tube with 200 µL of 1X B&W Buffer (5 mM Tris-HCl (pH 7.5), 0.5 mM EDTA, 1 M NaCl) by vortexing the beads in the wash solution, immobilizing the beads with the Magnetic Particle Concentrator (MPC) (Dynal), drawing the solution off from the immobilized beads and repeating. After the second wash, the beads were resuspended in 100 µL of 2X B&W Buffer (10 mM Tris-HCl (pH 7.5), 1 mM EDTA, 2 M NaCl), to which the entire 80 µL of the *Bst* polymerase-treated library and 20 µL of Molecular Biology Grade water were then added. The sample was then mixed by vortexing and placed on a horizontal tube rotator for 20 minutes at room temperature. The bead mixture was then washed twice with 200 µL of 1X B&W Buffer, then twice with 200 µL of Molecular Biology Grade water.

The final water wash was removed from the bead pack using the MPC, and 250 µL of Melt Solution (100 mM NaCl, and 125 mM NaOH) were added. The beads were resuspended with thorough mixing in the melt solution and the bead suspension incubated for 10 minutes at room temperature on a tube rotator.

In a separate 1.5mL centrifuge tube, 1250 µL of buffer PB (from the QiaQuick PCR Purification Kit) were neutralized through the addition of 9 µL of 20% aqueous acetic acid. Using the Dynal MPC, the beads in the melt solution were pelleted; the 250 µL of supernatant (containing the now single-stranded library) were carefully decanted and transferred to the tube of freshly-prepared neutralized buffer PB.

The 1500 µL of neutralized, single-stranded library were concentrated over a single column from a MinElute PCR Purification Kit (Qiagen), warmed to room temperature prior to use. Due to volume constraints, the sample was loaded and concentrated in two 750 µL aliquots. Concentration of each aliquot was conducted according to the manufacturer’s instructions for spin columns using a microcentrifuge, with the following modifications: the dry spin after the Buffer PE spin was extended to 2 minutes (rather than 1 minute) to ensure complete removal of the ethanol, and the single-stranded library sample was eluted in 15 µL of Buffer EB (Qiagen) at 55ºC.

*Library quantitation and quality assessment.*The quantity and quality of the resultant single-stranded DNA library was assessed with the Agilent 2100 and a fluorescent plate reader. As the library consisted of single stranded DNA, an RNA Pico 6000 LabChip for the Agilent 2100 was used and prepared according to the manufacturer’s guidelines. Triplicate 1 µL aliquots were analyzed, and the mean value reported by the Agilent analysis software wad used to estimate the DNA concentration. The final library concentration was typically in excess of 108 molecules/µL. The library samples were stored in concentrated form at -20ºC until needed.

Preparation of DNA Capture Beads

Packed beads from a 1 mL N-hydroxysuccinimide ester (NHS)-activated Sepharose HP affinity column (Amersham Biosciences, Piscataway, NJ) were removed from the column and activated as described in the product literature (Amersham Pharmacia Protocol # 71700600AP). Twenty-five microliters of a 1 mM amine-labeled HEG capture primer (5’-Amine-3 sequential 18-atom hexa-ethyleneglycol spacers **CCTATCCCCTGTGTGCCTTG**-3’) (IDT Technologies, Coralville, IA, USA) in 20 mM phosphate buffer, pH 8.0, were bound to the beads, after which 25-36 μm beads were selected by serial passage through 36 and 25 μm pore filter mesh sections (Sefar America, Depew, NY, USA). DNA capture beads that passed through the first filter, but were retained by the second were collected in bead storage buffer (50 mM Tris, 0.02% Tween, 0.02% sodium azide, pH 8), quantitated with a Multisizer 3 Coulter Counter (Beckman Coulter, Fullerton, CA, USA) and stored at 4ºC until needed.

Binding Template Species to DNA Capture Beads

Template molecules were annealed to complementary primers on the DNA Capture beads in a UV-treated laminar flow hood. One and one half million DNA capture beads suspended in bead storage buffer were transferred to a 200 µL PCR tube, centrifuged in a benchtop mini centrifuge for 10 seconds, the tube rotated 180˚ and spun for an additional 10 seconds to ensure even pellet formation. The supernatant was then removed, and the beads washed with 200 µL of Annealing Buffer (20 mM Tris, pH 7.5 and 5 mM magnesium acetate), vortexed for 5 seconds to resuspend the beads, and pelleted as above. All but approximately 10 µL of the supernatant above the beads were removed, and an additional 200 µL of Annealing Buffer were added. The beads were vortexed again for 5 seconds, allowed to sit for 1 minute, then pelleted as above. All but 10 µL of supernatant were discarded, and 1.2 µL of 2 x 107molecules per µL template library were added to the beads. The tube was vortexed for 5 seconds to mix the contents, after which the templates were annealed to the beads in a controlled denaturation/annealing program preformed in an MJ thermocycler (5 minutes at 80 oC, followed by a decrease by 0.1 oC /sec to 70 oC, 1 minute at 70 oC, decrease by 0.1 oC /sec to 60 oC, hold at 60 oC for 1 minute, decrease by 0.1 oC /sec to 50 oC, hold at 50 oC for 1 minute, decrease by 0.1 oC /sec to 20 oC, hold at 20 oC). Upon completion of the annealing process the beads were stored on ice until needed.

PCR Reaction Mix Preparation and Formulation

To reduce the possibility of contamination, the PCR reaction mix was prepared in a UV-treated laminar flow hood located in a PCR clean room. For each 1,500,000 bead emulsion PCR reaction, 225 µL of reaction mix (1X Platinum HiFi Buffer (Invitrogen), 1mM dNTPs (Pierce), 2.5 mM MgSO4 (Invitrogen), 0.1% Acetylated, molecular biology grade BSA (Sigma, St. Louis, MO), 0.01% Tween-80 (Acros Organics, Morris Plains, NJ), 0.003 U/µL thermostable pyrophosphatase (NEB), 0.625 µM forward (5’ - **CCATCTCATCCCTGCGTGTC**-3’) and 0.039 µM reverse primers (5’- **CCTATCCCCTGTGTGCCTTG** -3’) (IDT Technologies) and 0.15 U/µL Platinum Hi-Fi Taq Polymerase (Invitrogen)) were prepared in a 1.5 mL tube. Twenty-five microliters of the reaction mix were removed and stored in an individual 200 µL PCR tube for use as a negative control. Both the reaction mix and negative controls were stored on ice until needed. Additionally, 240 µL of mock amplification mix (1X Platinum HiFi Buffer (Invitrogen), 2.5 mM MgSO4 (Invitrogen), 0.1% BSA, 0.01% Tween) for every emulsion were prepared in a 1.5 mL tube, and similarly stored at room temperature until needed.

Emulsification and Amplification

The emulsification process creates a heat-stable water-in-oil emulsion with approximately 1,000 discrete PCR microreactors per microliter which serve as a matrix for single molecule, clonal amplification of the individual molecules of the target library. The reaction mixture and DNA capture beads for a single reaction were emulsified in the following manner: in a UV-treated laminar flow hood, 160 µL of PCR solution were added to the tube containing the 1,500,000 DNA capture beads. The beads were resuspended through repeated pipette action, after which the PCR-bead mixture was permitted to sit at room temperature for at least 2 minutes, allowing the beads to equilibrate with the PCR solution. Meanwhile, 400 µL of Emulsion Oil (**4**0 % (w/w) DC 5225C Formulation Aid (Dow Chemical Co., Midland, MI), 30% (w/w) DC 749 Fluid (Dow Chemical Co.), and 30% (w/w) Ar20 Silicone Oil (Sigma)) were aliquotted into a flat-topped 2 mL centrifuge tube (Dot Scientific, Burton, MI). The 240 μL of mock amplification mix were then added to 400 μL of emulsion oil, the tube capped securely and placed in a 24 well TissueLyser Adaptor (Qiagen) of a TissueLyser MM300 (Retsch GmbH & Co. KG, Haan, Germany). The emulsion was homogenized for 5 minutes at 25 oscillations/sec to generate the extremely small emulsions, or “microfines”, that confer additional stability to the reaction.

The combined beads and PCR reaction mix were briefly vortexed and allowed to equilibrate for 2 minutes. After the microfines had been formed, the amplification mix, templates and DNA capture beads were added to the emulsified material. The TissueLyser speed was reduced to 15 oscillations /sec and the reaction mix homogenized for 5 minutes. The lower homogenization speed created water droplets in the oil mix with an average diameter of 100 to 150 μm, sufficiently large to contain DNA capture beads and amplification mix.

The total volume of the emulsion is approximately 800 μL contained in one 2mL flat-topped centrifuge tube. The emulsion was aliquotted into 7-8 separate PCR tubes each containing roughly 100 µL. The tubes were sealed and placed in a MJ thermocycler along with the 25 l negative control made previously. The following cycle times were used:1X (4 minutes @ 94oC) – Hotstart Initiation, 40X (30 seconds @ 94oC, 60 seconds @ 58oC, 90 seconds @ 68oC) – Amplification, 13X (30 seconds @ 94 oC, 360 seconds at 58 oC) – Hybridization Extension. After completion of the PCR program, the reactions were removed and the emulsions either broken immediately (as described below) or the reactions stored at 10˚C for up to 16 hours prior to initiating the breaking process.

Breaking the Emulsion and Recovery of Beads

Fifty microliters of isopropyl alcohol (Fisher) were added to each PCR tube containing the emulsion of amplified material, and vortexed for 10 seconds to lower the viscosity of the emulsion. The tubes were centrifuged for several seconds in a microcentrifuge to remove any emulsified material trapped in the tube cap. The emulsion-isopropyl alcohol mix was withdrawn from each tube into a 10 mL BD-Disposable Syringe (Fisher Scientific) fitted with a blunt 16 gauge blunt needle (Brico Medical Supplies, Metuchen, NJ). An additional 50 µL of isopropyl alcohol were added to each PCR tube, vortexed, centrifuged as before, and added to the contents of the syringe. The volume inside the syringe was increased to 9 mL with isopropyl alcohol, after which the syringe was inverted and 1 mL of air was drawn into the syringe to facilitate mixing the isopropanol and emulsion. The blunt needle was removed, a 25 mm Swinlock filter holder (Whatman, Middlesex, United Kingdom) containing 15 m pore Nitex Sieving Fabric (Sefar America, Depew, NY, USA) attached to the syringe luer, and the blunt needle affixed to the opposite side of the Swinlock unit.

The contents of the syringe were gently but completely expelled through the Swinlock filter unit and needle into a waste container with bleach. Six milliliters of fresh isopropyl alcohol were drawn back into the syringe through the blunt needle and Swinlock filter unit, and the syringe inverted 10 times to mix the isopropyl alcohol, beads and remaining emulsion components. The contents of the syringe were again expelled into a waste container, and the wash process repeated twice with 6 mL of additional isopropyl alcohol in each wash. The wash step was repeated with 6 mL of 80% Ethanol / 1X Annealing Buffer (80% Ethanol, 20 mM Tris-HCl, pH 7.6, 5 mM Magnesium Acetate). The beads were then washed with 6 mL of 1X Annealing Buffer with 0.1% Tween (0.1% Tween-20, 20 mM Tris-HCl, pH 7.6, 5 mM Magnesium Acetate), followed by a 6 mL wash with picopure water.

After expelling the final wash into the waste container, 1.5 mL of 1 mM EDTA were drawn into the syringe, and the Swinlock filter unit removed and set aside. The contents of the syringe were serially transferred into a 1.5 mL centrifuge tube. The tube was periodically centrifuged for 20 seconds in a minifuge to pellet the beads and the supernatant removed, after which the remaining contents of the syringe were added to the centrifuge tube. The Swinlock unit was reattached to the filter and 1.5 mL of EDTA drawn into the syringe. The Swinlock filter was removed for the final time, and the beads and EDTA added to the centrifuge tube, pelletting the beads and removing the supernatant as necessary.

Second-Strand Removal

Amplified DNA, immobilized on the capture beads, was rendered single stranded by removal of the secondary strand through incubation in a basic melt solution. One mL of freshly prepared Melting Solution (0.125 M NaOH, 0.2 M NaCl) was added to the beads, the pellet resuspended by vortexing at a medium setting for 2 seconds, and the tube placed in a Thermolyne LabQuake tube roller for 3 minutes. The beads were then pelleted as above, and the supernatant carefully removed and discarded. The residual melt solution was then diluted by the addition of 1 mL Annealing Buffer (20 mM Tris-Acetate, pH 7.6, 5 mM Magnesium Acetate), after which the beads were vortexed at medium speed for 2 seconds, and the beads pelleted, and supernatant removed as before. The Annealing Buffer wash was repeated, except that only 800 µL of the Annealing Buffer were removed after centrifugation. The beads and remaining Annealing Buffer were transferred to a 0.2 mL PCR tube, and either used immediately or stored at 4˚C for up to 48 hours before continuing with the subsequent enrichment process.

Enrichment of Beads

Up to this point the bead mass was comprised of both beads with amplified, immobilized DNA strands, and null beads with no amplified product. The enrichment process was utilized to selectively capture beads with sequenceable amounts of template DNA while rejecting the null beads.

The single stranded beads from the previous step were pelleted by 10 second centrifugation in a benchtop mini centrifuge, after which the tube was rotated 180˚ and spun for an additional 10 seconds to ensure even pellet formation. As much supernatant as possible was then removed without disturbing the beads. Fifteen microliters of Annealing Buffer were added to the beads, followed by 2 µL of 100 µM biotinylated, 40 base HEG enrichment primer (5’ Biotin – 18-atom hexa-ethyleneglycol spacer - **CCATCTCATCCCTGCGTGTCCCATCTGTTCCCTCCCTGTC**-3’, IDT Technologies), complementary to the combined amplification and sequencing sites (each 20 bases in length) on the 3’-end of the bead-immobilized template. The solution was mixed by vortexing at a medium setting for 2 seconds, and the enrichment primers annealed to the immobilized DNA strands using a controlled denaturation/annealing program in an MJ thermocycler. (30 seconds @ 65C, decrease by 0.1 oC /sec to 58C, 90 seconds @ 58C, and a 10C hold.)

While the primers were annealing, a stock solution of SeraMag-30 magnetic streptavidin beads (Seradyn, Indianapolis, IN, USA) was resuspended by gentle swirling, and 20 μL of SeraMag beads were added to a 1.5 mL microcentrifuge tube containing 1 mL of Enhancing Fluid (2 M NaCl, 10 mM Tris-HCl, 1 mM EDTA, pH 7.5). The SeraMag bead mix was vortexed for 5 seconds, and the tube placed in a Dynal MPC-S magnet, pelletting the paramagnetic beads against the side of the microcentrifuge tube. The supernatant was carefully removed and discarded without disturbing the SeraMag beads, the tube removed from the magnet, and 100µL of enhancing fluid were added. The tube was vortexed for 3 seconds to resuspend the beads, and the tube stored on ice until needed.

Upon completion of the annealing program, 100 µL of Annealing Buffer were added to the PCR tube containing the DNA Capture beads and enrichment primer, the tube vortexed for 5 seconds, and the contents transferred to a fresh 1.5 mL microcentrifuge tube. The PCR tube in which the enrichment primer was annealed to the capture beads was washed once with 200 µL of annealing buffer, and the wash solution added to the 1.5 mL tube. The beads were washed three times with 1 mL of annealing buffer, vortexed for 2 seconds, pelleted as before, and the supernatant carefully removed. After the third wash, the beads were washed twice with 1 mL of ice cold enhancing fluid, vortexed, pelleted, and the supernatant removed as before. The beads were then resuspended in 150 µL ice cold enhancing fluid and the bead solution added to the washed SeraMag beads.

The bead mixture was vortexed for 3 seconds and incubated at room temperature for 3 minutes on a LabQuake tube roller, while the streptavidin-coated SeraMag beads bound to the biotinylated enrichment primers annealed to immobilized templates on the DNA capture beads. The beads were then centrifuged at 2,000 RPM for 3 minutes, after which the beads were gently “flicked” until the beads were resuspended. The resuspended beads were then placed on ice for 5 minutes. Following the incubation on ice, cold Enhancing Fluid was added to the beads to a final volume of 1.5 mL. The tube inserted into a Dynal MPC-S magnet, and the beads were left undisturbed for 120 seconds to allow the beads to pellet against the magnet, after which the supernatant (containing excess SeraMag and null DNA capture beads) was carefully removed and discarded.

The tube was removed from the MPC-S magnet, 1 mL of cold enhancing fluid added to the beads, and the beads resuspended with gentle flicking. It was essential not to vortex the beads, as vortexing may break the link between the SeraMag and DNA capture beads. The beads were returned to the magnet, and the supernatant removed. This wash was repeated three additional times to ensure removal of all null capture beads. To remove the annealed enrichment primers and SeraMag beads from the DNA capture beads, the beads were resuspended in 1 mL of melting solution, vortexed for 5 seconds, and pelleted with the magnet. The supernatant, containing the enriched beads, was transferred to a separate 1.5 mL microcentrifuge tube, the beads pelleted and the supernatant discarded. The enriched beads were then resuspended in 1X Annealing Buffer with 0.1% Tween-20. The beads were pelleted on the MPC again, and the supernatant transferred to a fresh 1.5 mL tube, ensuring maximal removal of remaining SeraMag beads. The beads were centrifuged, after which the supernatant was removed, and the beads washed 3 times with 1 mL of 1X Annealing Buffer. After the third wash, 800 µL of the supernatant were removed, and the remaining beads and solution transferred to a 0.2 mL PCR tube. The average yield for the enrichment process was 30% of the original beads added to the emulsion, or approximatly 450,000 enriched beads per emulsified reaction. As a 60x60mm2 slide requires 900,000 enriched beads, two 1,500,000 bead emulsions were processed as described above.

Sequencing Primer Annealing

The enriched beads were centrifuged at 2,000 RPM for 3 minutes and the supernatant decanted, after which 15 µL of annealing buffer and 3 µL of 100 mM sequencing primer (5’-CCATCTGTTCCCTCCCTGTC -3’, IDT Technologies), were added. The tube was then vortexed for 5 seconds, and placed in an MJ thermocycler for the following 4 stage annealing program: 5 minutes @ 65 oC, decrease by 0.1 oC /sec to 50 oC, 1 minute @ 50 oC, decrease by 0.1 oC /sec to 40 oC, hold at 40 oC for 1 minute, decrease by 0.1 oC /sec to 15 oC, hold at 15 oC.

Upon completion of the annealing program, the beads were removed from thermocycler and pelleted by centrifugation for 10 seconds, rotating the tube 180˚, and spun for an additional 10 seconds. The supernatant was discarded, and 200 µL of annealing buffer were added. The beads were resuspended with a 5 second vortex, and the beads pelleted as before. The supernatant was removed, and the beads resuspended in 100 µL annealing buffer, at which point the beads were quantitated with a Multisizer 3 Coulter Counter. Beads were stored at 4 oC and were stable for at least one week.

Incubation of DNA beads with *Bst* DNA polymerase, Large Fragment and SSB protein

Bead wash buffer (100 ml) was prepared by the addition of apyrase (Biotage, Uppsala Sweden) (final activity 8.5 units/liter) to 1x assay buffer containing 0.1% BSA. The fibreoptic slide was removed from picopure water and incubated in bead wash buffer. Nine hundred thousand of the previously prepared DNA beads were centrifuged and the supernatant was carefully removed. The beads were then incubated in 1290 µl of bead wash buffer containing 0.4 mg/mL polyvinyl pyrrolidone (MW 360,000), 1 mM DTT, 175 µg of *E. coli* single strand binding protein (SSB) (United States Biochemicals Cleveland, OH) and 7000 units of *Bst* DNA polymerase, Large Fragment (New England Biolabs). The beads were incubated at room temperature on a rotator for 30 minutes.

Preparation of enzyme beads and micro-particle fillers

UltraGlow Luciferase (Promega Madison WI) and *Bst* ATP sulfurylase were prepared in house as biotin carboxyl carrier protein (BCCP) fusions. The 87-aminoacid BCCP region contains a lysine residue to which a biotin is covalently linked during the *in vivo* expression of the fusion proteins in *E. coli*. The biotinylated luciferase (1.2 mg) and sulfurylase (0.4 mg) were premixed and bound at 4ºC to 2.0 mL of Dynal M280 paramagnetic beads (10 mg/mL, Dynal SA) according to the manufacturer’s instructions. The enzyme bound beads were washed 3 times in 2000 µL of bead wash buffer and resuspended in 2000 µL of bead wash buffer.

Seradyn microparticles (Powerbind SA, 0.8 µm, 10 mg/mL, Seradyn Inc, Indianapolis, IN) were prepared as follows: 1050 µL of the stock were washed with 1000 µL of 1X assay buffer containing 0.1% BSA. The microparticles were centrifuged at 9300 g for 10 minutes and the supernatant removed. The wash was repeated 2 more times and the microparticles were resuspended in 1050 µL of 1X assay buffer containing 0.1% BSA. The beads and microparticles were stored on ice until use.

Bead deposition

The Dynal enzyme beads and Seradyn microparticles were vortexed for one minute and 1000 µL of each were mixed in a fresh microcentrifuge tube, vortexed briefly and stored on ice. The enzyme / Seradyn beads (1920 µl) were mixed with the DNA beads (1300 µl) and the final volume was adjusted to 3460 µL with bead wash buffer. Beads were deposited in ordered layers. The fibreoptic slide was removed from the bead wash buffer and Layer 1, a mix of DNA and enzyme/Seradyn beads, was deposited. After centrifuging, Layer 1 supernatant was aspirated off the fibreoptic slide and Layer 2, Dynal enzyme beads, was deposited. This section describes in detail how the different layers were centrifuged.

**Layer 1.** A gasket that creates two 30x60 mm2 active areas over the surface of a 60x60 mm2 fibreoptic slide was carefully fitted to the assigned stainless steel dowels on the jig top. The fibreoptic slide was placed in the jig with the smooth unetched side of the slide down and the jig top/gasket was fitted onto the etched side of the slide. The jig top was then properly secured with the screws provided, by tightening opposite ends such that they are finger tight. The DNA-enzyme bead mixture was loaded on the fibreoptic slide through two inlet ports provided on the jig top. Extreme care was taken to minimize bubbles during loading of the bead mixture. Each deposition was completed with one gentle continuous thrust of the pipette plunger. The entire assembly was centrifuged at 2800 rpm in a Beckman Coulter Allegra 6 centrifuge with GH 3.8-A rotor for 10 minutes. After centrifugation the supernatant was removed with a pipette.

**Layer 2***.* Dynal enzyme beads (920 µL) were mixed with 2760 µL of bead wash buffer and 3400 µL of enzyme-bead suspension was loaded on the fibreoptic slide as described previously. The slide assembly was centrifuged at 2800 rpm for 10 min and the supernatant decanted. The fibreoptic slide was removed from the jig and stored in bead wash buffer until ready to be loaded on the instrument.

Sequencing on the 454 Instrument

All flow reagents were prepared in 1x assay buffer with 0.4 mg/mL polyvinyl pyrrolidone (MW 360,000), 1 mM DTT and 0.1% Tween 20. Substrate (300 µM D-luciferin (Regis, Morton Grove, IL) and 2.5 µM adenosine phophosulfate (Sigma)) was prepared in 1X assay buffer with 0.4 mg/mL polyvinyl pyrrolidone (MW 360,000), 1 mM DTT and 0.1% Tween 20. Apyrase wash is prepared by the addition of apyrase to a final activity of 8.5 units per liter in 1X assay buffer with 0.4 mg/mL polyvinyl pyrrolidone (MW 360,000), 1 mM DTT and 0.1% Tween 20. Deoxynucleotides dCTP, dGTP and dTTP (GE Biosciences Buckinghamshire, United Kingdom) were prepared to a final concentration of 6.5 µM, α-thio deoxyadenosine triphosphate (dATPS, Biolog, Hayward, CA) and sodium pyrophosphate (Sigma) were prepared to a final concentration of 50 µM and 0.1 µM, respectively, in the substrate buffer.

The 454 sequencing instrument consists of three major assemblies: a fluidics subsystem, a fibreoptic slide cartridge/flow chamber, and an imaging subsystem. Reagents inlet lines, a multi-valve manifold, and a peristaltic pump form part of the fluidics subsystem. The individual reagents are connected to the appropriate reagent inlet lines, which allows for reagent delivery into the flow chamber, one reagent at a time, at a pre-programmed flow rate and duration. The fibreoptic slide cartridge/flow chamber has a 300 m space between the slide’s etched side and the flow chamber ceiling. The flow chamber also included means for temperature control of the reagents and fibreoptic slide, as well as a light-tight housing. The polished (unetched) side of the slide was placed directly in contact with the imaging system.

The cyclical delivery of sequencing reagents into the fibreoptic slide wells and washing of the sequencing reaction byproducts from the wells was achieved by a pre-programmed operation of the fluidics system. The program was written in the form of an Interface Control Language (ICL) script, specifying the reagent name (Wash, dATPS, dCTP, dGTP, dTTP, and PPi standard), flow rate and duration of each script step. Flow rate was set at 4 mL/min for all reagents and the linear velocity within the flow chamber was approximately ~1 cm/s. The flow order of the sequencing reagents were organized into kernels where the first kernel consisted of a PPi flow (21 seconds), followed by 14 seconds of substrate flow, 28 seconds of apyrase wash and 21 seconds of substrate flow. The first PPi flow was followed by 21 cycles of dNTP flows (dC-substrate-apyrase wash-substrate dA-substrate-apyrase wash-substrate-dG-substrate-apyrase wash-substrate-dT-substrate-apyrase wash-substrate), where each dNTP flow was composed of 4 individual kernels. Each kernel is 84 seconds long (dNTP-21 seconds, substrate flow-14 seconds, apyrase wash-28 seconds, substrate flow-21 seconds); an image is captured after 21 seconds and after 63 seconds. After 21 cycles of dNTP flow, a PPi kernel is introduced, and then followed by another 21 cycles of dNTP flow. The end of the sequencing run is followed by a third PPi kernel. The total run time was 244 minutes. Reagent volumes required to complete this run are as follows: 500 mL of each wash solution, 100 mL of each nucleotide solution. During the run, all reagents were kept at room temperature. The temperature of the flow chamber and flow chamber inlet tubing is controlled at 30 °C and all reagents entering the flow chamber are pre-heated to 30 °C.

Imaging System

The camera is a Spectral Instruments (Tucson, AZ) Series 600 camera with a Fairchild Imaging LM485 CCD (4096x4096 15 μm pixels), directly bonded to a 1-1 imaging fibre bundle. The camera, cooled to -20 °C, can be operated in either of two modes: (i) frame transfer mode, in which the center portion of the CCD is used for imaging while the outer portion of the CCD is used for image storage and slow read-out (this mode is used for the smaller fibreoptic slides) or (ii) full frame mode, in which the entire CCD is used for imaging and read-out occurs during the wash (i.e. dark) portion of each flow cycle (this mode is used for the 60x60 mm2 slide). The data is read out through 4 ports, one at each corner of the CCD. Signal integration was set at 28 seconds per frame, with a frame shift time of approximately 0.25 second in the frame transfer mode; in the full frame mode, signal integration (frame duration) was set at 21 seconds (wash capture frame) and 63 seconds (nucleotide capture frame). All camera images were stored in UTIFF 16 format on a computer hard drive (IBM eServer xSeries 337, IBM, White Plains, NY).

Interwell Diffusion

To assess the sensitivity of our system to reaction by-products diffusing from one well into a neighboring one, we developed a simplified one-dimensional model of interwell diffusion behavior. We have found that at the current well-to-well distance of 50 µm, diffusion of ATP will induce a background signal on the order of 10% or less in an immediately neighboring well. We developed correction computer algorithms to suppress this source of noise.

We created a one-dimensional model of the fibreoptic faceplate (i.e. modeled a linear array of wells) in which the wells are represented as lumped chemical reactors that produce pyrophosphate and ATP during the sequencing reaction. Within each well the generation of reaction by-products can be modeled by a set of coupled kinetic equations as follows:

Numerical solution of this set of equations is shown in Supplementary Figure 3.

When considering two adjacent wells, the following set of equations must be added:

The cross-talk between wells is characterized by a mass transfer coefficient *kc* and a mixing ratio ** determined by the flow conditions and the well geometry. The parameters (*kc*, ** are obtained by solving a complete three-dimensional two-well problem, using a finite-element method; their values are then extended to the multi-well modeling for similar flows and well geometries. This separation of transport and chemical reactions phenomena allows us to simulate sequencing at high fibreoptic faceplate occupation numbers, and to probe the effects of chemical contamination between neighboring wells. Numerical solution of the equations shows that interwell effects remain low, even at a significantly reduced pitch (8 μm) (Supplementary Figure 4).

Field Programmable Gate Arrays (FPGA)

The on-board computer is fitted with an accessory RC2000 PCI board (Celoxica, Abingdon, UK) hosting a 6 million gate Virtex II FPGA (Field Programmable Gate Array) chip (Xilinx, San Jose, CA). We have developed software to download to the FPGA binary modules that encode in hardware the algorithms to perform the successive image processing steps. Handel-C (Celoxica, Abingdon, UK) was used to design FPGA hardware logic. At the conclusion of a sequencing run all of the data is available to the on-board computer to execute final signal adjustments and to align the fragments to a specified genome or to perform shotgun assembly. Without FPGA, image processing for the sequencing runs described here takes an additional 6 hours on the on-board computer.

Image Processing

Once applied to the imaging system, the fibreoptic slide’s position does not shift; this makes it possible for the image analysis software to determine the location (in CCD pixel coordinates) of each well, based on light generation during a PPi standard flow which precedes each sequencing run. In operation, the entire slide is simultaneously imaged by the camera. A single well is imaged by approximately 9 pixels. The first step in processing data is to perform background subtraction for each acquired image *at the pixel level,* using an “erosion-dilation” algorithm that automatically determines the local background for each pixel. Then, for each nucleotide flow, the light intensities collected, over the entire duration of the flow by the pixels covering a particular well, are summed to generate a signal for that particular well at that particular flow. We correct the acquired images to eliminate cross-talk between wells due to optical bleed (the fibreoptic cladding is not completely opaque and transmits a small fraction of the light generated within a well into an adjacent well) and to diffusion of ATP or PPi (generated during synthesis) from one well to another one further downstream. To perform this correction, we empirically determined the extent of crosstalk under low occupancy conditions and derived deconvolution matrices to remove from each well’s signal the contribution coming from neighboring wells. In order to account for variability in the number of enzyme-carrying beads in each well and variability in the number of template copies bound to each bead, two types of normalization are carried out: (i) raw signals are first normalized by reference to the pre- and post-sequencing run PPi standard flows, (ii) these signals are further normalized by reference to the signals measured during incorporation of the first three bases of the known “key” sequence included in each template.

Signal Processing

We correct the signals measured at each flow and in each well to account for carry forward and incomplete extension. It is straightforward to calculate the extent of synchronism loss for any known sequence, assuming given levels of carry forward and incomplete extension. Supplementary Table 1, the result of model calculation, illustrates the impact of these effects on sequencing accuracy; it shows the extent of incomplete extension and carry forward that can be tolerated, *assuming that no correction is performed*, in order to achieve a read accuracy of approximately 99% at various read lengths. Alternatively, higher levels of accuracy can be achieved with similar values of incomplete extension and carry forward by using an inverse transformation to correct the raw signals for loss of synchronism, or, higher levels of incomplete extension and carry forward can be accommodated at the same level of accuracy by correcting signals. Since the amount of carry forward and incomplete extension, as well as the underlying sequence, is unknown a priori, our approach is based on an iterative technique and two-dimensional minimization to achieve a least squares fit between the measured signals and the model’s output. The impact of carry forward and incomplete extension is felt particularly towards the end of reads due to the cumulative effect of theses errors.

Test Fragments

We created difficult-to-sequence fragments that include ascending and descending stretches of identical bases (homopolymers) of increasing length (2N, 3N, 4N, 5N, 6N, 5N, 4N, 3N, 2N), interspersed with single nucleotides, to investigate the sequencing performance of the instrument. These fragments allow us to eliminate from our assessment any sample preparation or emulsion PCR artifacts that may cause additional errors. Overall sequencing accuracy is shown in Table1 and further broken down by homopolymer in Supplementary Figure 5.

*Purification of Test Fragment Plasmid DNA.*  Individual test fragments were cloned into the pBluescript II KS + vector (Stratagene, La Jolla, CA), transfected into *E. coli* cultures and stored at -80 ºC in glycerol until needed. Individual vials of the *E. coli* cultures, each containing one of the 6 individual test fragments, were plated and grown on LB Amp / X-gal Agar Petri plates. The plasmid containing colonies were selected by blue/white screening and grown to saturation overnight at 37 ºC in liquid LB broth with ampicillin. The plasmids were harvested and purified from 25 mL of the culture using the QiaFilter Midi plasmid purification kit (Qiagen), following the manufacturer’s instructions. Purified plasmids were diluted to 10 ng/µL in 1X TE (10 mM Tris, 1 mM EDTA, pH 7.5) and stored at -20 ºC.

*PCR Amplification of Test Fragments.* The test fragments were biotinylated by amplifying them with a pair of PCR primers, one of which contained 5’ biotin. Nine hundred eighty microliters of PCR master mix (1X Platinum HiFi Buffer (Invitrogen), 1mM dNTPs (Pierce), 2.5 mM MgSO4 (Invitrogen), 1 µM forward (5’- CGTTTCCCCTGTGTGCCTTG -3’) and 1 µM biotinylated reverse primers (5’-Biotin-3 sequential 18-atom hexa-ethyleneglycol spacers CCATCTGTT GCGTGCGTGTC -3’) (IDT Technologies) and 0.02 U/µL Platinum Hi-Fi Taq Polymerase (Invitrogen) were prepared in a 1.5 mL tube, thoroughly mixed via vortexing, and a 50 µL negative control removed. Twenty microliters of a given test fragment were added to the remainder, the solution mixed and dispensed in 50 µL aliquots into 0.2mL PCR tubes. The process was repeated for each of the 5 remaining test fragments. The PCR reactions and corresponding negative controls were placed in a MJ thermocycler and amplified under the following conditions: 4 minute hot start initiation @ 94 °C, followed by 39 amplification cycles comprised of 15 seconds @ 94 °C, 30 seconds @ 58 °C, 90 seconds @ 68 °C, and a single extension at 68 ºC for 120 seconds. The amplification ended with an infinite hold at 10 ºC. The biotinylated PCR fragments were purified by processing them with a MinElute PCR Clean-Up Kit (Qiagen) according to the manufacturer’s instructions, except that each 950 µL of PCR reaction generated for each test fragment were split over 6 MinElute columns, and pooled after the final step. The quantity and quality of PCR product was assessed with the Agilent 2100 BioAnalyzer, using a DNA 500 LabChip prepared according to the manufacturer’s guidelines. Triplicate 1 µL aliquots were analyzed; the concentration of the purified PCR product typically fell between 1 and 3 pmol/μl.

*Binding the biotinylated PCR Product to streptavidin beads*, Biotinylated PCR products were immobilized onto sieved Sepharose Streptavidin-coated particles (Amersham) at 10 million DNA copies/bead as follows. Five 50 mL bottles of Sepharose streptavidin particles were sieved through a 28 µm N/28/17/65 nylon mesh (Sefar America, Depew, NY, USA) to exclude the large beads. The beads that passed through this filter were then passed through a N25/19/55 nylon mesh (Sefar America) with a 25 µm pore size. The beads retained by the filter, exhibiting a size range between 27 and 32 µm diameter, were then quantitated on a Multisizer 3 Coulter Counter (Beckman) and subsequently used to bind the biotinylated test fragments. An aliquot of 700,000 of the sieved beads were washed once with 100 μL of 2 M NaCl solution, vortexed briefly to resuspend them, then centrifuged for 1 minute at maximum speed in a Minifuge to pellet the beads. The supernatant was then removed, after which the beads were washed again with 2M NaCl and resuspended in 30 µL of 2 M NaCl. A total of 11.6 pmoles of biotinylated PCR product was added to beads, vortexed to resuspend the beads in solution and allowed to bind to the streptavidin beads for 1 hour at room temperature on a titer plate shaker, at speed 7. The non-biotinylated second strand was removed by incubation in an alkaline melt solution (0.1 M NaOH / 0.15 M NaCl) for 10 minutes at room temperature in a horizontal tube rotator. The supernatant, containing the denatured, non-biotinylated strand was discarded, and the beads washed once with 100 μL of melt solution and three times with 100 μL of 1 X annealing buffer (50 mM Tris-Acetate, pH 7.5; 5 mM MgCl2). The beads were then centrifuged for one minute at maximum speed on a Minifuge, the supernatant discarded, and the beads resuspended in 25 μL of 1 X annealing buffer. Five microliters of 100 μM sequencing primer (5’- CCATCTGTTCCCTCCCTGTC – 3’, IDT Technologies) were added to the bead suspension. The bead/primer mix was then vortexed for 5 seconds, and placed in an MJ thermocycler for the following 4 stage annealing program: 5 minutes @ 60 °C, decrease by 0.1 °C /sec to 50 °C, 1 minute @ 50 °C, decrease by 0.1 °C /sec to 40 °C, hold at 40 °C for 1 minute, decrease by 0.1 °C /sec to 15 °C, hold at 15 °C. Following the annealing step, the beads were washed twice with 100 μL of 1X annealing buffer (20 mM Tris, pH 7.5 and 5 mM magnesium acetate) and resuspended in a final volume of 200 μL with 1X annealing buffer. The beads were stored in 10 µL aliquots in labeled tube strips, in a 4 °C refrigerator until needed.

High Quality Reads

Each flow, in each well, results in no incorporation, or incorporation of one, or two, or three, etc. nucleotides. For any sequencing run, a histogram of signal intensities for each of these groups can be compiled (when dealing with a known sequence). As illustrated in Supplementary Figure 6, the signal strengths of the various groups overlap slightly. Generally, good reads (i.e. those that map to a reference genome with few errors) have most of their signals close to integral values equal to the number of incorporated nucleotides. Supplementary Figure 7 shows that the average of all measured signals for homopolymers of successive lengths increases linearly with homopolymer length, to a very high degree of accuracy. We have found that those reads in which a substantial number of signals fall in the overlap region between a negative flow (one in which no nucleotide is incorporated) and a positive flow (one in which at least one nucleotides is incorporated) (0.5 <signal <0.7) are of poor quality (i.e. do not map anywhere in the genome or do so with a large number of errors), mostly because such reads originate from beads that carry copies of two or more templates. This allowed us to develop an *a priori* filter for selecting “High Quality Reads”: for each read, we count the number of flows that fall in the overlap region and select only those reads whose number of such flows is less than 5% of the total number of flows. For reads that do not meet this criterion, we progressively trim the read by eliminating flows, starting from the end of the read, until the criterion is either satisfied (number of flows in indeterminate region < 5% of remaining flows) or the number of flows has been reduced to less than 84 (21 cycles), at which point the read is considered to have been filtered out of the pool of High Quality Reads.

Base Calling

In principle, the intensity of an observed signal directly indicates the number of incorporated nucleotides. However, as illustrated in Supplementary Figure 6, the *distributions* of signal strengths of the various homopolymers overlap slightly. Were it not for this overlap, it would be possible to base call unambiguously any given sequence of signals. In pyrophosphate-based sequencing the two types of direct errors are overcalls (calling one more base than actually present in the genome) or undercalls (calling one less base than actually present in the genome). The identity of a base is not in question since it is determined by the addition of one known nucleotide at a time. Substitution errors (miscalling one base for another) result from the occurrence of two consecutive errors (undercall followed by overcall or vice-versa) and are therefore significantly rarer. We observed that the average error rate, at the single read level, is higher for library reads than for test fragments (compare Supplementary Figure 5 and Supplementary Figure 8). We developed computer models of the expected signals to verify that our measurements, and higher error rates, are consistent with the hypothesis that, when sequencing libraries, some beads carry copies of more than one template. Most of these reads get filtered out by the selection process described above. Those, however, for which the admixture significantly favors one template, may not be filtered out and contribute heavily to the overall error rate.

At the individual read level, Tables 1 and 2 report error rates that are referred to the total number of bases aligned. These numbers are analogous to error rates reported by current sequencers; however, they do not best characterize the intrinsic performance of the instrument since errors also can occur during negative flows. Each flow, whether negative or positive, can be assigned an error rate. For instance, for the 238,066 *M. genitalium* reads analyzed in Table 2, the insertion rate referenced to the total number of flows is 1.53% (compared to 2.01% when referenced to the number of bases aligned); similarly the deletion error rate referenced to the total number of flows is 1.48% (compared to 1.94% when referenced to the number of bases aligned).

Quality Scores

The confidence in (or “quality” of) any particular base call associated with a given signal value is a function of where that signal falls in the distribution of signals, for a given homopolymer length. Based on a large number of runs in which we sequenced various known genomes (Adenovirus, *S. aureus, M. genitalium*), as well as test fragments, and mapped the resulting reads, we determined that negative flows follow a lognormal distribution, while all positive flows are normally distributed with mean (Supplementary Figure 7) and standard deviation proportional to the underlying homopolymer length; furthermore these distributions remain remarkably invariant across different genomes and test fragments. This observation allows the calculation of a quality score for each individual base called. To estimate a quality score for a particular base call, the probability must be determined that the measured signal originates from a homopolymer of length at least equal to the called length. For instance, if two A’s are called for a particular signal, the quality score for the second A is given by the probability that the observed signal came from a homopolymer of length two or greater. Since the probability of measuring a signal, *given a homopolymer length*, was empirically established, Bayes’ Theorem can be used to determine the probability that a particular homopolymer length produced the observed signal, as follows:

where s is the observed signal and n is the length of the homopolymer that produced the signal. As described above, the probability P(s|n) of measuring signal s given a homopolymer of length n follows a Gaussian distribution. For a random nucleotide sequence, the probability P(n) of encountering a homopolymer of length n is simply 1/4n (ignoring a multiplicative normalization constant). The quality score assigned to each base called for each fragment can then be reported as a *phred*-equivalent using the following transformation:

We verified the validity of this approach by correlating calculated *phred* scores and observed *phred* scores, sequencing known genomes other than those used to establish the distribution of signals (Supplementary Figure 10). Our correlation shows excellent correspondence up to *phred* 50 and compares favorably to that established for Sanger sequencing and capillary eletrophoresis 3.

Flow-space Mapping, Consensus Accuracy and Genome Coverage

Given the order in which nucleotides are flowed, a given reference genome implies a known succession of ideal signal values. This ideal flowgram is divided into contiguous, overlapping, sub-flowgrams of a particular length (default length is 24 flows) which are indexed so as to allow very rapid searching (each sub-flowgram starts at a positive flow). To map the query flowgram to the target, we divide the query flowgram into sliding sub-flowgrams having the length that was used in the indexing step and search the space of indexed ideal sub-flowgrams. A perfect match anchors the query flowgram against the reference genome. The alignment of the read is then assessed beginning at the 5’ end, moving down the entire length of the read. The longest segment that meets a user-specified total mismatch threshold is selected, at which point the alignment is terminated and the read is trimmed. The reads are aligned to the reference at a very low level of stringency in order to detect mutations or other genomic variations. Once such alignments have been performed, all the flow signals from the various reads that correspond to the same location in the target are arithmetically averaged, after which individual base-calling is performed. As illustrated in Supplementary Figure 8, this procedure is extremely effective in reducing error rates; it is equally applicable whether re-sequencing or consensus base calling a *de* novo assembly. We estimate the quality of the average signal (without relying on knowledge of the underlying sequence) by measuring the absolute value of its distance from the closest signal threshold for the corresponding homopolymer, and dividing it by the normalized standard deviation of all the signals measured at that particular genome location. We call this ratio the *Z-score*. To enhance the reliability of observed variations, the consensus sequence is filtered by imposing a minimum Z-score to give rise to a high quality consensus sequence. By using an exactly known sequence, we determine the number of errors which yields an estimate of the quality of the consensus calls and the correlation between minimum Z-score and consensus accuracy. We report genome coverage based on regions with consensus sequence accuracy of 99.99% or better, which typically is achieved by selecting a minimum Z-score equal to 4. Without Z-score restriction, we naturally achieve larger coverage at slightly lower consensus accuracy.

*De novo* Sequence Assembler

We select high quality reads (as described above) to ensure that the flowgrams to be processed consist most likely of sequence data from the original sample. The Overlapper performs a complete all-against-all fragment comparison to identify all possible overlaps between fragments. To assemble the read fragments produced by the instrument, the Overlapper assesses read similarity by directly comparing the flowgrams of each read; we currently use a scalar product to assess similarity between flowgrams:

Score = i S1i S2i

where S1i and S2i are the signal intensities (normalized such that the length of each “vector” is equal to 1) and the sum is carried out over the putative overlap region. We have found that a threshold value of 0.85-0.90 provides optimum predictivity and selectivity. If the observed overlap score between two flowgram regions exceeds the selected minimum stringency value, an overlap flag is set for this read pair. (The overlap determination takes into account the possibility of reverse complement reads as well.) To increase efficiency, Overlapper uses a hashing indexing method to quickly identify fragments that might be considered as potential overlap candidates. Given the set of all pair-wise overlaps between reads determined by the Overlapper, the Unitigger module groups these reads into unitigs. A unitig is a collection of reads whose overlaps between each other are consistent and uncontested by reads external to the unitig. A unitig’s ends represent entries or exits from repeat regions in the genome being assembled or from completely unsequenced regions. Unitigs are constructed from consistent chains of maximal depth overlaps (i.e. pair wise reads whose maximal overlaps are with each other). Finally, Multialigner takes all the reads that make up the unitigs and aligns all the read signals. It performs a consensus call by first averaging the signals for a given location to obtain a single average signal which is used to perform the actual base call.

The unitigs generated by the Multialigner are then sent to through a contig optimization process, in which breaks caused by deficiencies in the overlap detection or the use of chains of maximal depth overlaps are repaired. The Multialigner unitigs have the property that their ends stretch into repeat regions or into regions “fractured” into multiple contigs by one or more errant reads that may break the chain of maximal overlaps. The contig optimization process involves three steps. The first step performs an all-against-all unitig comparison and joins any overlaps detected between the unitigs. This comparison, performed in nucleotide space, is followed by a branch-point analysis which identifies repeat region boundaries based on where contig sequences diverge from a common region. Contigs are broken at those boundaries, and any non-repeat contig larger than 500 bases is output.

The second step of the contig optimization process takes the contigs from the first step and performs a “restitching”, in which any read that spans two contig ends is used to join those contigs. As with the first step, this is performed in nucleotide space and the branch-point analyzer is used to identify any repeat-region joins. The final step is a quality control step, where all of the reads are mapped to the resulting contig sequences, contigs are broken wherever there are less than 4 spanning reads, and only contigs larger than 500 bases are output.

Finally, a consensus regeneration step is performed to calculate the final contig consensi. This step uses the same flowspace mapping and consensus generation procedure described in the previous section, except that an iterative procedure is performed, where new consensi are reused as input to the procedure until no bases with a Z-score of 4 or more change. The resulting contigs and consensus sequences are then output by the assembler process.

Double Ended Sequencing

In order to perform sequencing from both ends of a single template within an individual well (“double ended sequencing”), the emulsion PCR procedure is altered, with two oligonucleotide primers (one in each direction) attached to the Sepharose DNA capture bead. The adaptor sequences used in the ssDNA library preparations are constructed such that two unique sequencing primers are incorporated into the library fragments (one for each strand). In double ended sequencing, two sequencing primers are used, with the second sequencing primer protected by a 3’-phosphate. Sequencing is performed in one direction as with single ended sequencing. The first strand sequencing is terminated by flowing a Capping Buffer containing 25 mM Tricine, 5 mM Magnesium acetate, 1 mM DTT, 0.4 mg/mL PVP, 0.1 mg/mL BSA, 0.01% Tween and 2 µM of each dideoxynucleotide and 2 µM of each deoxynucleotide. The residual deoxynucleotides and dideoxynucleotides are removed by flowing Apyrase Buffer containing 25 mM Tricine, 5 mM Magnesium acetate, 1 mM DTT, 0.4 mg/mL PVP, 0.1 mg/mL BSA, 0.01% Tween and 8.5 units/L of Apyrase. The second blocked primer is unblocked by removing the phosphate group from the 3’ end of the modified 3’ phosphorylated primer by flowing a cutting buffer containing 5 units/mL of Calf intestinal alkaline phosphatase in 25 mM Tricine, 5 mM Magnesium acetate, 1 mM DTT, 0.4 mg/mL PVP, 0.1 mg/mL BSA, 0.01% Tween. The second unblocked primer is activated by addition of polymerase by flowing 1000 units/mL of Bst DNA polymerase, Large Fragment, to capture all the available primer sites. Sequencing of the second strand by Bst DNA polymerase, Large Fragment, proceeds through sequential addition of nucleotides for a predetermined number of cycles just as in single ended sequencing. In proof-of-concept experiments we have demonstrated that double ended sequencing does produce paired-end reads with no significant loss in sequencing quality for the second strand. Supplementary Figure 11 shows the read lengths of mapped paired reads from amplified fragments in a double ended sequencing run of S. *aureus* COL 4 (21 cycles followed by 21 cycles); Supplementary Table 2 summarizes sequencing statistics, at the individual read level, for both reads.

1. Pan, H. *et al.*, The complete nucleotide sequences of the SacBII Kan domain of the P1 pAD10-SacBII cloning vector and three cosmid cloning vectors: pTCF, svPHEP, and LAWRIST16. *GATA* **11**, 181 (1994).
2. Bankier, A. T., Weston, K. M. and Barrell, B. G., Random cloning and sequencing by the M13/dideoxynucleotide chain termination method. *Meth. Enzymol.* **155**, 51 (1987).
3. Li, M., Nordbord, M. and Li, L. M., Adjust quality scores from alignment and improve sequencing accuracy. *Nucleic Acids Research* **32**, 5183 (2004).
4. de Lencastre, H., Tomasz, A., Reassessment of the number of auxiliary genes essential for expression of high-level methicillin resistance in Staphylococcus aureus. *Antimicrob Agents Chemother.* **38**, 2590 (1994).
